# Supplementary material for: A C4-modified bipyridinium multi-mode stationary phase for reversed phase, hydrophilic interaction and ion exchange chromatography
Source: Royal Society of Chemistry journal article supplement (doi:10.1039/d3ay01796f), 2023-01-01
Supplement: d3ay01796f1.pdf [file d3ay01796f1.pdf]

## **C4-modified bipyridinium multi-mode stationary phase for reversed phase, hydrophilic interaction and ion exchange chromatography**

Yali Yang<sup>a,c</sup>, Yan Li<sup>b</sup>, Zelong Long<sup>b</sup>, Lingling Han<sup>a</sup>, Kaijun Quan<sup>c</sup>, Jia Chen<sup>c</sup>, Xiuhui Liu<sup>a,\*</sup>,

Hongdeng Qiu<sup>c,\*</sup>

<sup>a</sup> Key Laboratory of Bioelectrochemistry & Environmental Analysis of Gansu Province, College of Chemistry & Chemical Engineering, Northwest Normal University, Lanzhou 730070, China.

<sup>b</sup> Xinjiang Uygur Autonomous Product Quality Supervision and Inspection Institute, Urumqi 830000, China.

<sup>c</sup> CAS Key Laboratory of Chemistry of Northwestern Plant Resources and Key Laboratory for Natural Medicine of Gansu Province, Lanzhou Institute of Chemical Physics, Chinese Academy of Sciences, Lanzhou 730000, China.

\* Corresponding E-mail: [hdqiu@licp.cas.cn](mailto:hdqiu@licp.cas.cn) (H. Qiu); [liuxh@nwnu.edu.cn](mailto:liuxh@nwnu.edu.cn) (X. Liu)

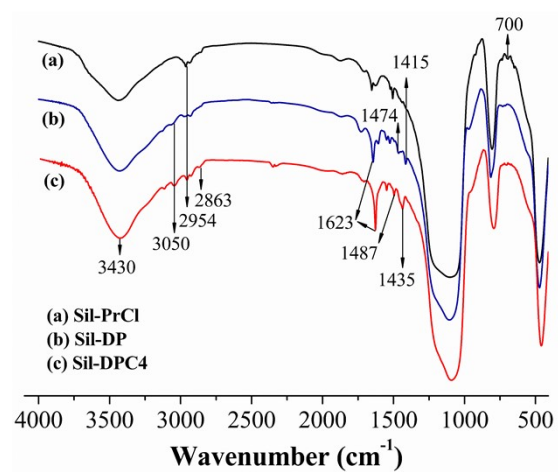

**Figure S1.** FT-IR analysis of Sil-PrCl (a), Sil-DP (b), and Sil-DPC4 (c).

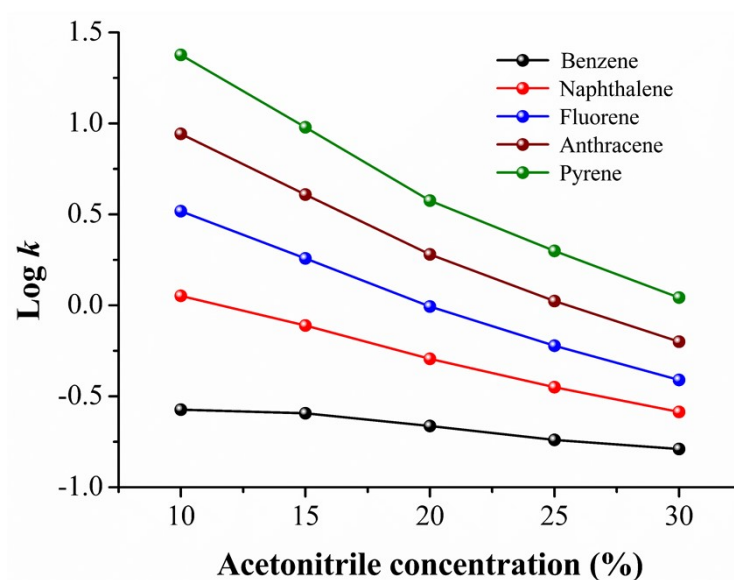

**Figure S2.** Effect of acetonitrile concentration on Log  $k$  of PAHs. Analytes: benzene (1), naphthalene (2), fluorene (3), anthracene (4), pyrene (5); mobile phase: different acetonitrile concentration in water; flow rate: 0.5mL/min; UV detection: 254 nm; Temperature: 25 °C.

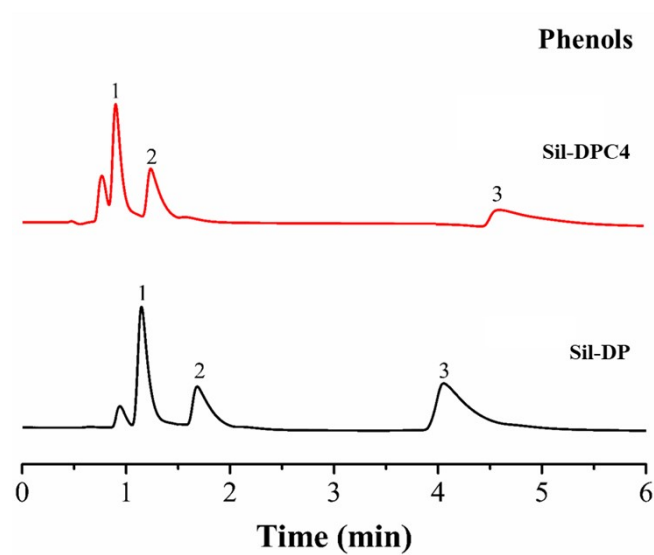

**Figure S3.** Separation of Phenols on Sil-DPC4 and Sil-DP. Analytes: 4-Aminophenol (1), 4-Chlorophenol (2), p-Nitrophenol (3). Mobile phase: 100% water. Flow rate: 0.5mL/min, and UV detection: 254 nm. Temperature: 25 °C.

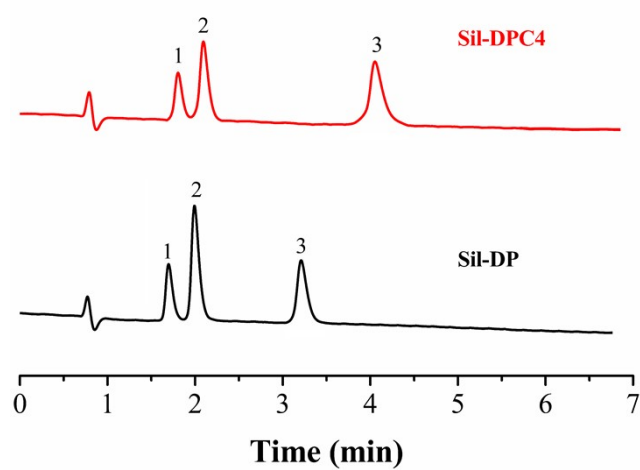

**Figure S4.** Separation of organic ions on Sil-DPC4 and Sil-DP. Solute: sodium benzenesulfonate (1), sodium benzoate (2), potassium biphthalate (3); Mobile phase: 25% ACN in 50 mmol/L phosphate buffer solution at pH. 4.5. UV detection: 210 nm. Flow: 0.5 mL/min. Temperature: 25 °C.

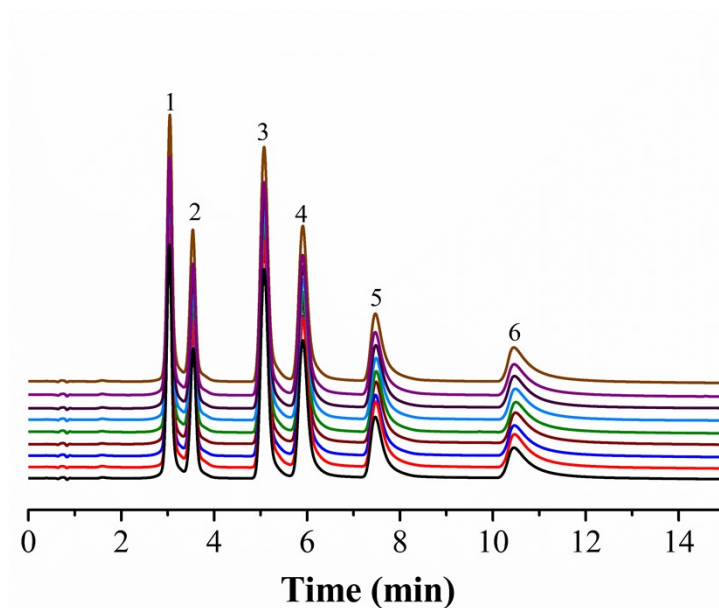

**Figure S5.** The reproducibility test of Sil-DPC4. Analytes: iodate (1), nitrite (2), bromide (3), nitrate (4), iodide (5), and thiocyanate (6). Mobile phase: 10 mmol/L phosphate buffer solution at pH 3.1. Flow rate: 0.5mL/min, and UV detection: 210 nm. Temperature: 25 °C.

**Table S1.** Elemental analysis and surface coverage of Sil-PrCl, Sil-DP and Sil-DPC4.

|          | N%   | C%    | H%   | Surface coverage ( $\mu\text{mol} / \text{m}^2$ ) |
|----------|------|-------|------|---------------------------------------------------|
| Sil-PrCl | 0.44 | 5.69  | 0.72 | 4.93                                              |
| Sil-DP   | 1.37 | 10.01 | 1.05 | 1.13                                              |
| Sil-DPC4 | 1.29 | 10.89 | 1.38 | 0.57                                              |
| Sil-C18  |      | 15.23 | 2.86 | 2.2                                               |
